# Supplementary material for: Hepatoprotective and Antioxidant Effects of Saponarin, Isolated fromGypsophila trichotomaWend. on Paracetamol-Induced Liver Damage in Rats
Source: Hindawi journal article supplement (doi:10.1155/2013/757126), 2013-01-01
Supplement: f1 [file 757126.f1.pdf]

# ==== Shimadzu LCsolution Method File Infomation ====

Sample Information  
 Acquired by : Admin  
 Sample Name : Proba3st  
 Sample ID :  
 Vail# :  
 Injection Volume : 20 uL  
 Data Filename : Arginin 12.lcd  
 Method Filename : julian.lcm  
 Batch Filename :  
 Report Filename : Method File Report.lcr  
 Date Acquired : 18.4.2013 7. 11:19:10  
 Data Processed : 18.4.2013 7. 11:40:26

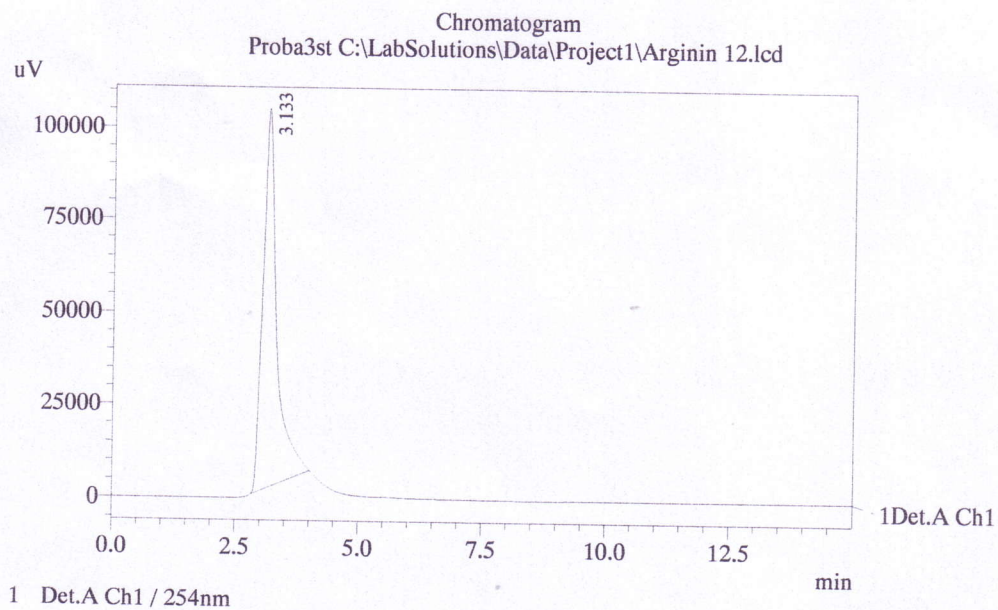

PeakTable

Detector A Ch1 254nm

| Peak# | Ret. Time | Area    | Height | Area %  | Height % |
|-------|-----------|---------|--------|---------|----------|
| 1     | 3.133     | 2003093 | 102447 | 100.000 | 100.000  |
| Total |           | 2003093 | 102447 | 100.000 | 100.000  |
